# Supplementary material for: PRKAR1B-AS2 Long Noncoding RNA Promotes Tumorigenesis, Survival, and Chemoresistance via the PI3K/AKT/mTOR Pathway
Source: MDPI journal article supplement (doi:10.3390/ijms22041882), 2021-02-13
Supplement: s1 [file s1]

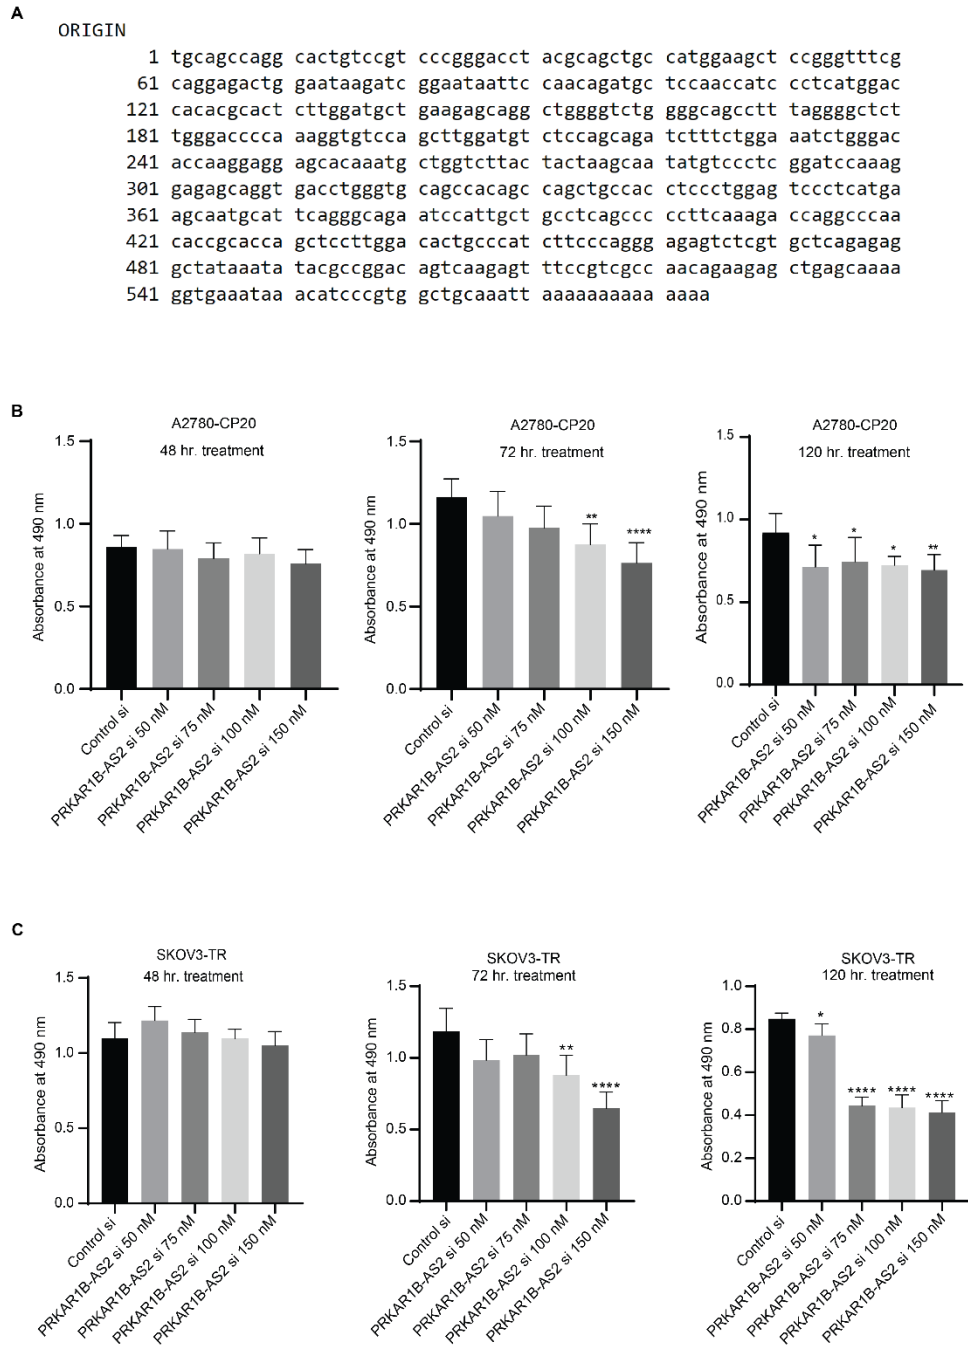

**Supplementary Figure S1. Analysis of PRKAR1B-AS2 long noncoding RNA.** (A) Nucleotide sequence of PRKAR1B-AS2. (B) Effect of PRKAR1B-AS2 knockdown on A2780-CP20 viability after 48, 72, and 120 h of treatment. (C) Effect of PRKAR1B-AS2 knockdown on SKOV3-TR viability after 48, 72, and 120 h of treatment.

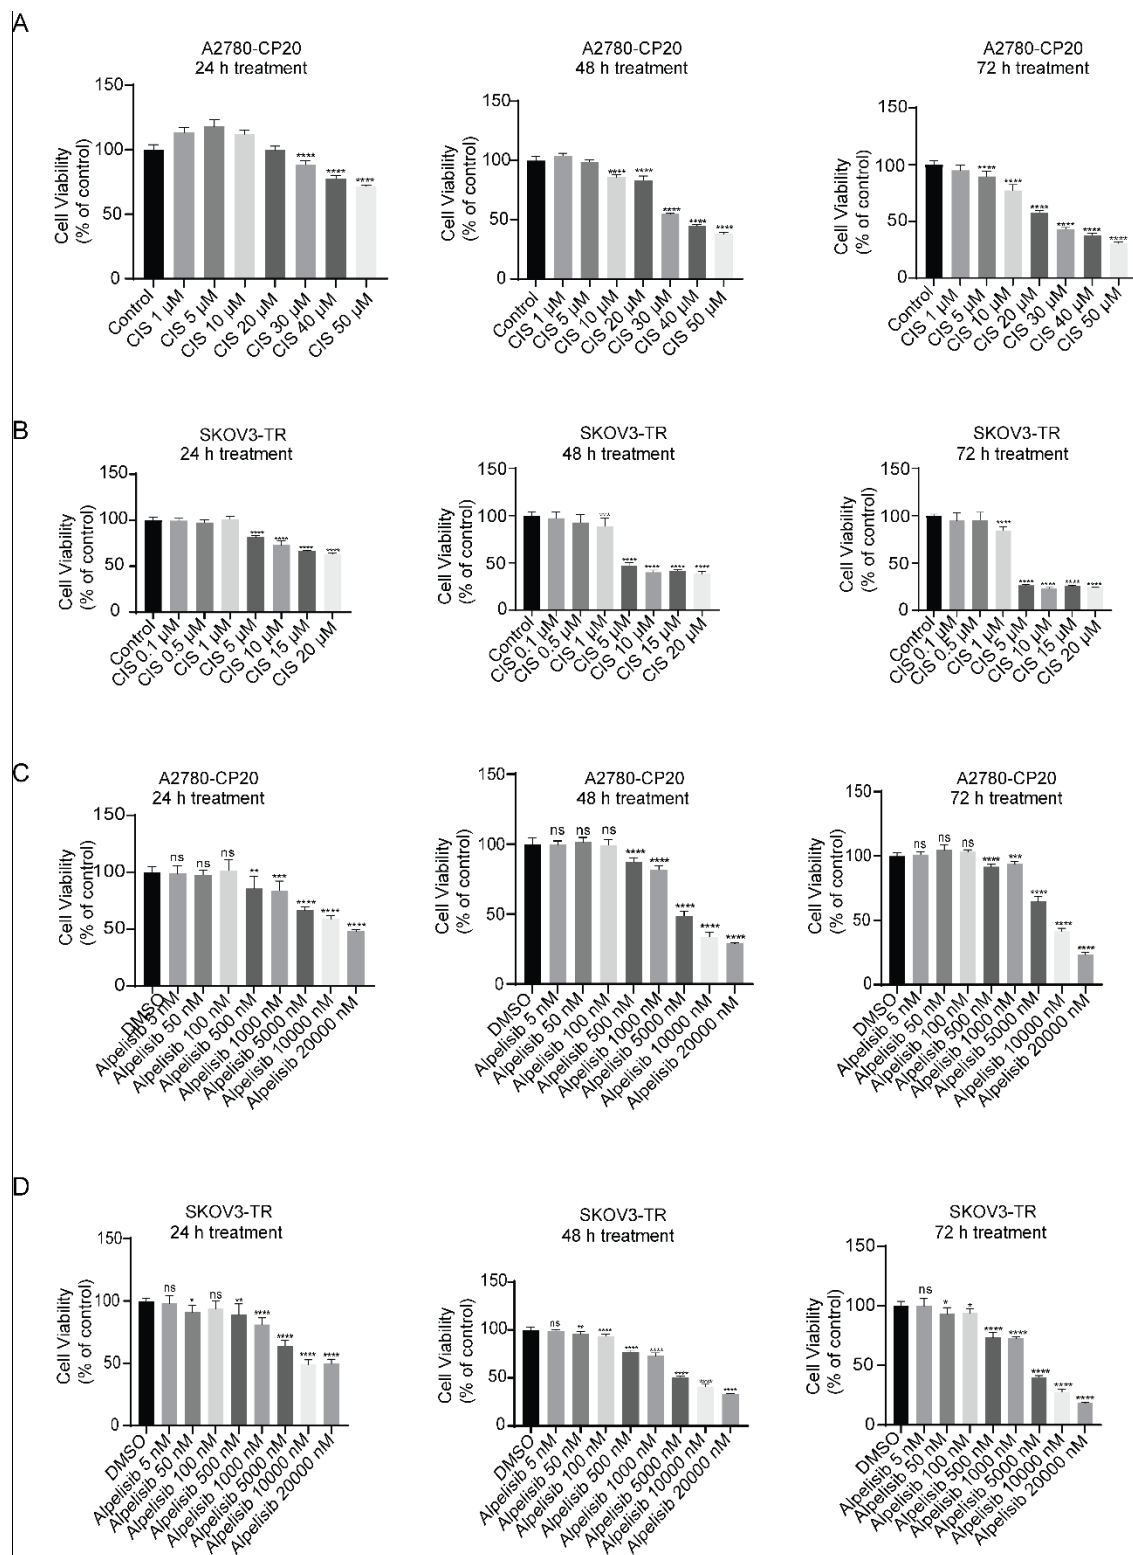

**Supplementary Figure S2. Cytotoxic effect of cisplatin (CIS) and alpelisib on A2780-CP20 and SKOV3-TR cells.**  
 (A) Effect of cisplatin on A2780-CP20 viability. (B) Effect of cisplatin on SKOV3-TR viability. (C) Effect of alpelisib on A2780-CP20 viability. (D) Effect of alpelisib on SKOV3-TR viability.

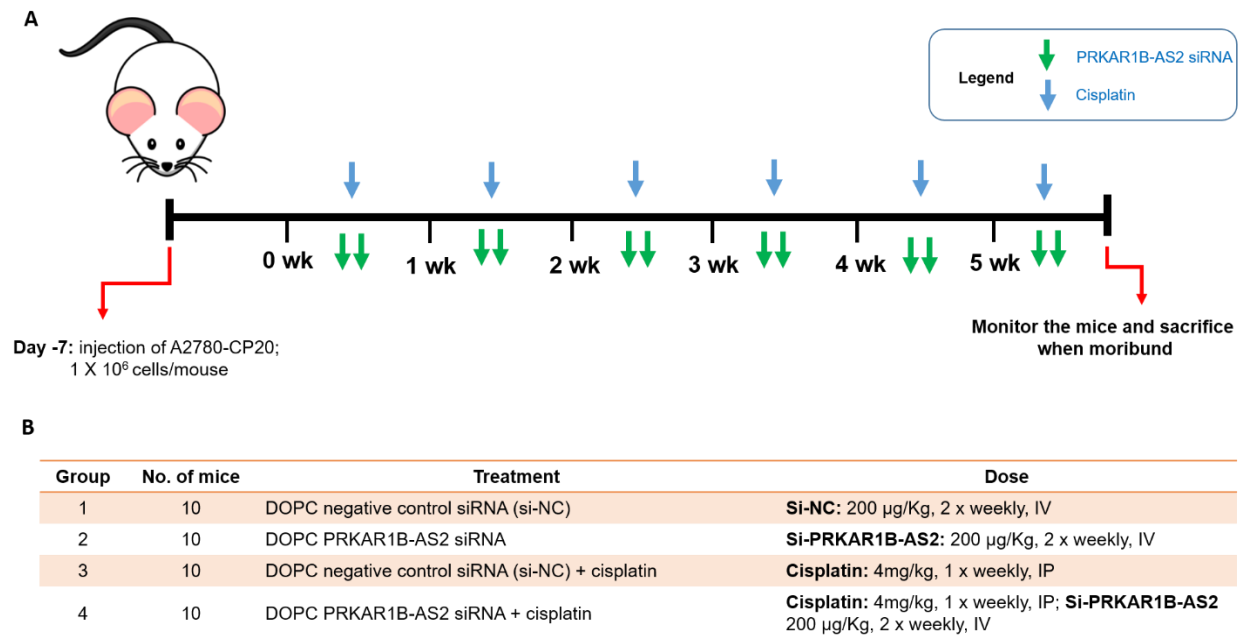

**Supplementary Figure S3. *In vivo* experiment.** (A) Design of the A2780-CP20 xenograft mouse models. (B) Treatment scheme for the four groups.
